# Supplementary material for: Infection prevention and control measures for preterm infants discharged into the community: a scoping review protocol
Source: Syst Rev. 2023 May 8;12:82. doi: 10.1186/s13643-023-02236-y (PMC10166051; doi:10.1186/s13643-023-02236-y)
Supplement: Supplementary file 1 — Additional file 1. [file 13643_2023_2236_MOESM1_ESM.zip]

Archive with 2 entries (2 files):
- KC PRISMA-S ChecklistR3.docx
- KC SR PRISMA-ScR-Fillable-Checklist_11Sept2019R3.pdf
